# Supplementary material for: Adhesion of two-dimensional titanium carbides (MXenes) and graphene to silicon
Source: PubMed Central journal article supplement (PMC6614499; doi:10.1038/s41467-019-10982-8), 2019-07-08
Supplement: 41467_2019_10982_MOESM1_ESM.pdf [file 41467_2019_10982_MOESM1_ESM.pdf]

1 **SUPPLEMENTARY INFORMATION**

2 **Adhesion of Two-Dimensional Titanium Carbides (MXenes) and Graphene to Silicon**

3

4 Li et al.

5

## 6 Supplementary Notes

### 7 Supplementary Note 1: Accuracy analysis of adhesion measurements

8 The jump-off instability has been the main concern when using AFM to measure adhesion forces.

9 To avoid the unstable jump-off, the adhesive force gradient between the spherical tip and sample  
10 surface should be much greater than the spring stiffness of the AFM cantilever<sup>1</sup>. Here, we  
11 calculated the force *versus* displacement and obtained the force gradients for each type of specimen  
12 approaching the maximum adhesion. These values were compared with the slope of the  
13 cantilever's spring constant (2 N m<sup>-1</sup>) to demonstrate the accuracy of the adopted method.

14 The pairwise interaction energy between the atom on the tip and the atom on the sample surface  
15 was assumed in the form of Lennard-Jones potential:

$$16 \quad W_{LJ}(r) = -\frac{C_1}{r^6} + \frac{C_2}{r^{12}}. \quad (1)$$

17 Integration of Eq. (1) gives the interaction energy per unit area between the sample surface and the  
18 tip,  $E$  (see supporting information of reference 2)<sup>2</sup>:

$$19 \quad E = -\gamma \left[ \frac{3}{2} \left( \frac{Z_0}{Z} \right)^3 - \frac{1}{2} \left( \frac{Z_0}{Z} \right)^9 \right], \quad (2)$$

20 where  $Z_0$  is the separation between tip and sample surface,  $Z$  is the distance between the sample  
21 surface and the spherical tip and  $\gamma$  is the adhesion energy per unit area at  $Z_0$ . The corresponding  
22 adhesive traction ( $f$ ) and force gradient ( $k_{vdW}$ ) can be obtained by taking the negative first and  
23 second derivatives of  $E$  as follows:

$$24 \quad f = -\frac{dE}{dZ} = -\frac{9\gamma}{2Z_0} \left[ \left( \frac{Z_0}{Z} \right)^4 - \left( \frac{Z_0}{Z} \right)^{10} \right], \quad (3)$$

25  $k_{vdW} = -\frac{d^2E}{dZ^2} = -\frac{27\gamma}{Z_0^3} \left[ -\frac{2}{3} \left( \frac{Z_0}{Z} \right)^5 + \frac{5}{3} \left( \frac{Z_0}{Z} \right)^{11} \right]. \quad (4)$

26 The adhesion force ( $F$ ) can then be obtained by:

27  $F = \pi a^2 f, \quad (5)$

28 where  $a$  is the contact radius at “jump-off” obtained using Carpick’s solution<sup>3</sup> to the Maugis-

29 Dugdale model as:

30  $a = \left[ 1.54 + 0.279 \left( \frac{2.28\mu^{1.3}-1}{2.28\mu^{1.3+1}} \right) \right] \left[ \frac{0.98(1-e^{-1.082\mu})}{1+0.98(1-e^{-1.082\mu})} \right]^{2/3} \left( \frac{K}{\pi\gamma R^2} \right)^{-1/3}, \quad (6)$

31 The parameter  $\mu$  is defined as:

32  $\mu = 1.157 \left( \frac{16R\gamma^2}{9K^2Z_0^3} \right)^{1/3}, \quad (7)$

33  $\mu$  ranges between 0 and infinity, which correspond to the Derjaguin-Muller-Toporov (DMT) and

34 Johnson-Kendall-Roberts (JKR) models, respectively.  $R$  is the tip radius,  $\gamma$  and  $Z_0$  are defined in

35 Eq. (2), and  $K$  is the reduced elastic modulus:

36  $K = \frac{4}{3} \frac{1}{(1-\nu_1^2)/E_1 + (1-\nu_2^2)/E_2}. \quad (8)$

37 where  $E_1$ ,  $\nu_1$  and  $E_2$ ,  $\nu_2$  are the elastic moduli and the Poisson’s ratios for the tip and specimen,

38 respectively. Since the specimen thickness is low, the elastic properties of amorphous silicon

39 dioxide (SiO<sub>2</sub>) were used in the analysis. The elastic properties for SiO<sub>2</sub> were taken as

40  $E_{SiO_2} = 70$  GPa,  $\nu_{SiO_2} = 0.3$  (See supporting information in reference 2)<sup>2</sup>. The equilibrium separation

41 of the surface  $Z_0$  was set as 0.30 nm based on the interaction between graphene and SiO<sub>2</sub><sup>4</sup>, same

42 value was assumed for MXene as well. The maximum adhesive force can then be obtained at

43  $k_{vdW} = 0$ . The maximum force gradients ( $F_k$ ) for SiO<sub>2</sub>, graphene, and MXene are 68750 N m<sup>-1</sup>,

44 28640N m<sup>-1</sup>, and 13624N m<sup>-1</sup>, respectively, with ±10% error. For comparison, the dashed straight  
45 lines with the slope of the cantilever's spring stiffness were plotted tangential to the curves at the  
46 maximum adhesive force points in Supplementary Figure 1. These results demonstrate that the  
47 measured adhesion is the maximum adhesion of the sample surfaces.

#### 48 **Supplementary Note 2: Determination of $\lambda$ in Maugis-Dugdale Theory for this experiment**

49 For Eq. (1) in the main text,  $\lambda$  is the coefficient ranging between 1.5 and 2. The JKR theory and  
50 DMT theory describe two extreme contacts between spherical particle and flat surface when  $\lambda=1.5$ ,  
51 and  $\lambda=2$ , respectively.

52 An empirical fitting equation often used<sup>3</sup> to solve for the coefficient  $\lambda$  is employed:

$$53 \quad \lambda = \left| -\frac{7}{4} + \frac{1}{4} \left( \frac{4.04\mu^{1.4}-1}{4.04\mu^{1.4}+1} \right) \right|. \quad (9)$$

54 where  $\mu$  is defined in Eq. (7). The solved  $\lambda$  varies for each case, depending on the jump-off  
55 adhesion force. From the calculations,  $\lambda=1.613$  for SiO<sub>2</sub>,  $\lambda=1.587$ , 1.543, 1.543 for mono-, bi-, and  
56 tri-layer graphene,  $\lambda=1.560$  and 1.558 for 1- and 15-monolayer Ti<sub>3</sub>C<sub>2</sub>T<sub>x</sub>, and 1.602 and 1.602 for  
57 1- and 19-monolayer Ti<sub>2</sub>CT<sub>x</sub>, respectively.

#### 58 **Supplementary Note 3: XPS analysis of Ti<sub>3</sub>C<sub>2</sub>T<sub>x</sub> and Ti<sub>2</sub>CT<sub>x</sub> MXene samples**

59 We examined MXene surface chemistry by XPS. The commonly anticipated functional groups on  
60 MXene flakes are -OH, -O- and -F. XPS survey for Ti<sub>3</sub>C<sub>2</sub>T<sub>x</sub> MXene film shows F/O atomic ratio  
61 0.37 (Supplementary Figure 4), while for Ti<sub>2</sub>CT<sub>x</sub> MXene film it is 0.32 (Supplementary Figure 4).  
62 Thus, the results indicate almost same F/O ratio for both MXenes (as expected). Hence, we  
63 conclude that surface chemistry is more or less same for both Ti<sub>3</sub>C<sub>2</sub>T<sub>x</sub> and Ti<sub>2</sub>CT<sub>x</sub> MXenes.

64 According to nuclear magnetic resonance studies<sup>5</sup>, the majority of O atoms for MXene samples  
65 produced by MILD method belong to bridging Ti-O-Ti groups.

#### 66 **Supplementary Note 4: Statistical variation in measured adhesion energy**

67 The measured adhesion energy variation among different flakes can be found in Figure 5a. For  
68 each type of graphene flake (mono-, bi-, or tri-layer), experiment numbers 1-27 are from batch 1.  
69 1-9 represent measurements for #1 graphene flake, 10-18 for #2, and 19-27 for #3 graphene flake.  
70 Experiment numbers 28-54 are from batch 2. 28-36 represent measurements for #4 graphene flake,  
71 37-45 for #5, and 46-54 for #6 graphene flake. For MXene flakes, experiment numbers 1-81 are  
72 from batch 1 (total of 9 different thickness). Experiment numbers 1-9 are for thickness #1, 10-18  
73 for thickness #2, 19-27 for thickness #3, 28-36 for thickness #4 37-45 for thickness #5, 46-54 for  
74 thickness #6, 55-63 for thickness #7, 64-72 for thickness #8, 73-81 for thickness #9. Experiment  
75 numbers 82-90 and 91-99 are from batch 2 and 3 individually. Experiment numbers 100-180 are  
76 from batch 4 (total of 9 thicknesses) and the numbers have same meaning as for batch 1.  
77 Experiment numbers 181-189 and 190-199 are from batches 5 and 6 individually. The maximum  
78 fluctuations of measured adhesion energy over the corresponding average values for graphene  
79 samples are shown in Supplementary Table 1. The maximum fluctuations of measured adhesion  
80 energy over the corresponding average values for MXene samples are shown in Supplementary  
81 Table 2. The maximum fluctuation for adhesion energy measured for  $Ti_3C_2T_x$  and  $Ti_2CT_x$  is within  
82 12% of the average. Therefore, there is no thickness dependency observed.

83 All adhesion measurements were performed using the same AFM tip. The tip was found to be  
84 intact after each experiment under SEM and was calibrated before and after each experiment. For  
85 each number of layers of graphene (mono-, bi-, and tri- graphene samples), 6 flakes were chosen.  
86 9 measurements were conducted on each flake. For each thickness of  $Ti_3C_2T_x$  or  $Ti_2CT_x$  flake, 6

87 flakes were selected and 3 measurement were conducted on the grid areas as illustrated in the  
 88 Supplementary Figure 9a.

89 Samples from three separate batches were tested. The batch-to-batch variations in measured  
 90 adhesion energies are small: within 7% and 8% of the average values for  $Ti_3C_2T_x$  and  $Ti_2CT_x$ ,  
 91 respectively. The details of these measurements and comparisons are provided in Supplementary  
 92 Figure 7.

93 The calculation data on adhesion energies from all measurements are provided in the  
 94 Supplementary data in Excel format.

95

96 **Supplementary Table 1. Statistical variation of adhesion energy measurements for graphene**

| Adhesion Energy, $J m^{-2}$              | Sample     | Experiment Number         |                           |                           |
|------------------------------------------|------------|---------------------------|---------------------------|---------------------------|
|                                          |            | 1-9 (batch 1, flake #1)   | 10-18 (batch 1, flake #2) | 19-27 (batch 1, flake #3) |
| Maximum fluctuation/<br>Average value, % | Mono-layer | 4.67                      | 4.81                      | 4.67                      |
|                                          | Bi-layer   | 3.20                      | 1.50                      | 2.72                      |
|                                          | Tri-layer  | 4.96                      | 5.03                      | 5.80                      |
| Adhesion Energy, $J m^{-2}$              | Sample     | 28-36 (batch 2, flake #4) | 37-45 (batch 2, flake #5) | 46-54 (batch 2, flake #6) |
|                                          |            |                           |                           |                           |
| Maximum fluctuation/<br>Average value, % | Mono-layer | 5.09                      | 5.99                      | 4.67                      |
|                                          | Bi-layer   | 4.55                      | 4.68                      | 4.30                      |
|                                          | Tri-layer  | 2.00                      | 3.03                      | 3.29                      |

97

98

99

100

101

102 **Supplementary Table 2. Statistical variation of adhesion energy measurements for MXene**

| Adhesion Energy, J m <sup>-2</sup>       | Sample                                        | Experiment Number               |                                 |                                 |                                 |                                 |
|------------------------------------------|-----------------------------------------------|---------------------------------|---------------------------------|---------------------------------|---------------------------------|---------------------------------|
|                                          |                                               | 1-9 (batch 1, thickness #1)     | 10-18 (batch 1, thickness #2)   | 19-27 (batch 1, thickness #3)   | 28-36 (batch 1, thickness #4)   | 37-45 (batch 1, thickness #5)   |
| Maximum fluctuation/<br>Average value, % | Ti <sub>3</sub> C <sub>2</sub> T <sub>x</sub> | 3.94                            | 4.55                            | 5.48                            | 2.70                            | 1.67                            |
|                                          | Ti <sub>2</sub> CT <sub>x</sub>               | 7.68                            | 9.47                            | 6.15                            | 4.68                            | 8.97                            |
| Adhesion Energy, J m <sup>-2</sup>       | Sample                                        | 46-54 (batch 1, thickness #6)   | 55-63 (batch 1, thickness #7)   | 64-72 (batch 1, thickness #8)   | 73-81 (batch 1, thickness #9)   | 82-90 (batch 2)                 |
| Maximum fluctuation/<br>Average value, % | Ti <sub>3</sub> C <sub>2</sub> T <sub>x</sub> | 0.73                            | 7.38                            | 11.21                           | 8.31                            | 1.78                            |
|                                          | Ti <sub>2</sub> CT <sub>x</sub>               | 9.47                            | 5.46                            | 11.68                           | 9.15                            | 6.00                            |
| Adhesion Energy, J m <sup>-2</sup>       | Sample                                        | 91-99 (batch 3)                 | 100-108 (batch 4, thickness #1) | 109-117 (batch 4, thickness #2) | 118-126 (batch 4, thickness #3) | 127-135 (batch 4, thickness #4) |
| Maximum fluctuation/<br>Average value, % | Ti <sub>3</sub> C <sub>2</sub> T <sub>x</sub> | 4.23                            | 5.91                            | 8.12                            | 8.90                            | 11.98                           |
|                                          | Ti <sub>2</sub> CT <sub>x</sub>               | 6.21                            | 7.68                            | 9.47                            | 6.15                            | 4.68                            |
| Adhesion Energy, J m <sup>-2</sup>       | Sample                                        | 136-144 (batch 4, thickness #5) | 145-153 (batch 4, thickness #6) | 154-162 (batch 4, thickness #7) | 163-171 (batch 4, thickness #8) | 172-180 (batch 4, thickness #9) |
| Maximum fluctuation/<br>Average value, % | Ti <sub>3</sub> C <sub>2</sub> T <sub>x</sub> | 5.16                            | 8.22                            | 0.92                            | 10.18                           | 11.21                           |
|                                          | Ti <sub>2</sub> CT <sub>x</sub>               | 8.97                            | 9.47                            | 5.46                            | 11.13                           | 9.15                            |
| Adhesion Energy, J m <sup>-2</sup>       | Sample                                        | 181-189 (batch 5)               | 190-198 (batch 6)               |                                 |                                 |                                 |
| Maximum fluctuation/<br>Average value, % | Ti <sub>3</sub> C <sub>2</sub> T <sub>x</sub> | 10.02                           | 3.34                            |                                 |                                 |                                 |
|                                          | Ti <sub>2</sub> CT <sub>x</sub>               | 8.00                            | 7.75                            |                                 |                                 |                                 |

103

104

105 **Supplementary Figures**

106

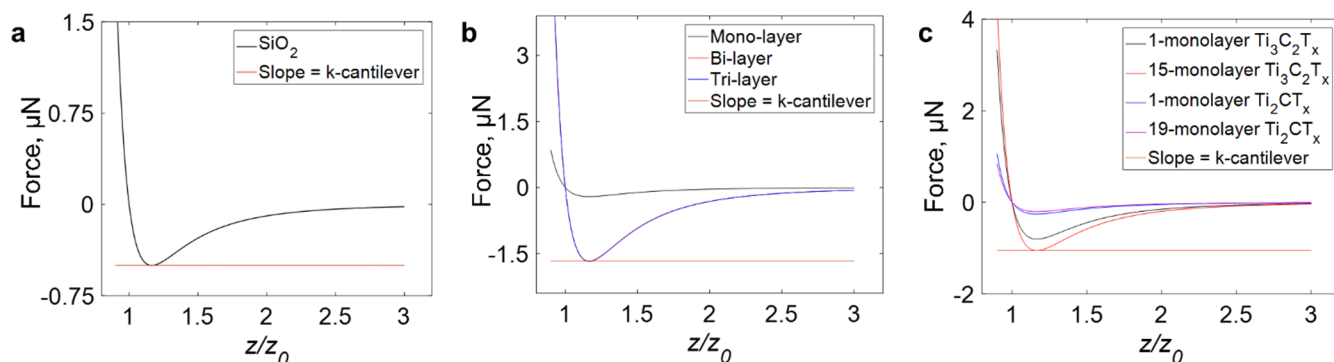

107

108 **Supplementary Figure 1.** Force curves for different samples used in this study. (a) SiO<sub>2</sub>/SiO<sub>2</sub>, (b)

109 SiO<sub>2</sub>/graphene and (c) SiO<sub>2</sub>/MXene.

110

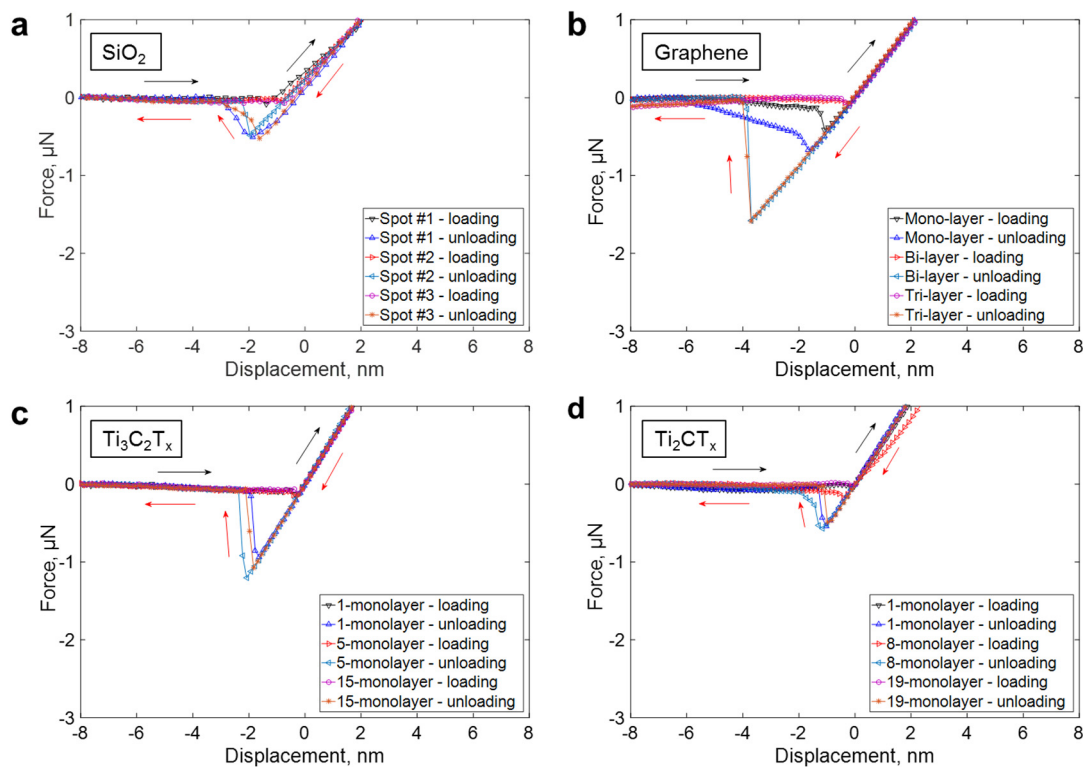

111

112 **Supplementary Figure 2.** Force *versus* displacement responses for different interfacial

113 interactions. (a) SiO<sub>2</sub>/SiO<sub>2</sub>, (b) SiO<sub>2</sub>/graphene, (c) SiO<sub>2</sub>/Ti<sub>3</sub>C<sub>2</sub>T<sub>x</sub>, (d) SiO<sub>2</sub>/Ti<sub>2</sub>CT<sub>x</sub>.



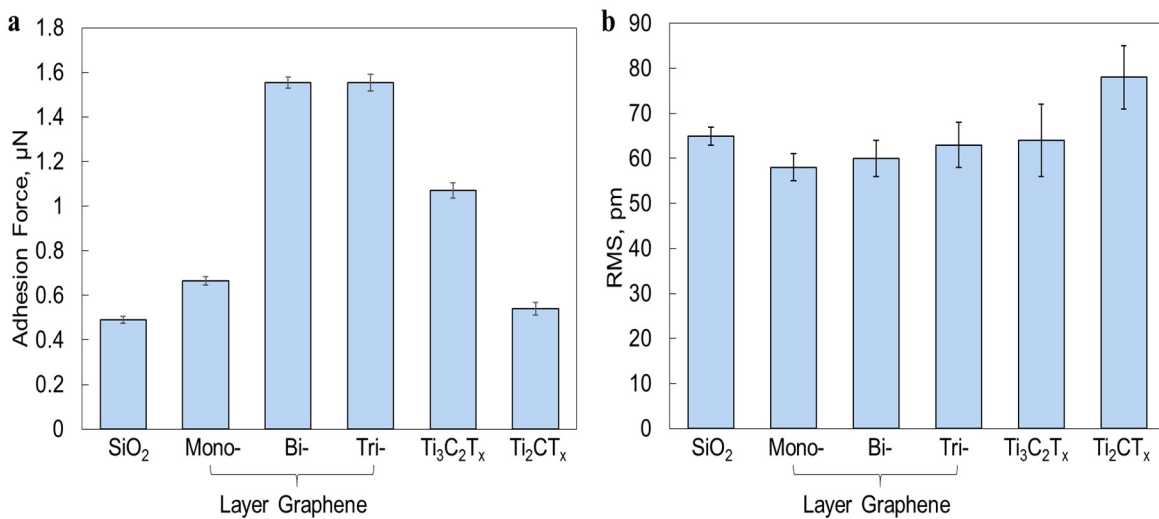

114  
 115 **Supplementary Figure 3.** Average measured (a) adhesion forces and (b) RMS values with error  
 116 bars indicating standard deviations.  
 117

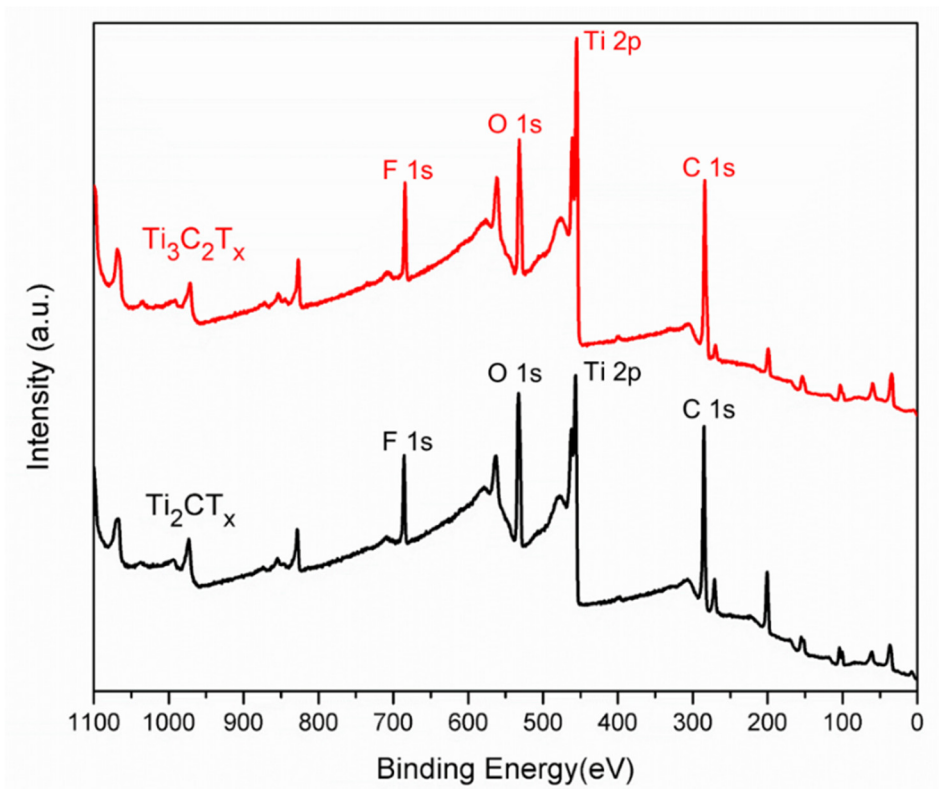

118  
 119 **Supplementary Figure 4.** XPS survey spectra of  $\text{Ti}_3\text{C}_2\text{T}_x$  and  $\text{Ti}_2\text{CT}_x$  MXene films.

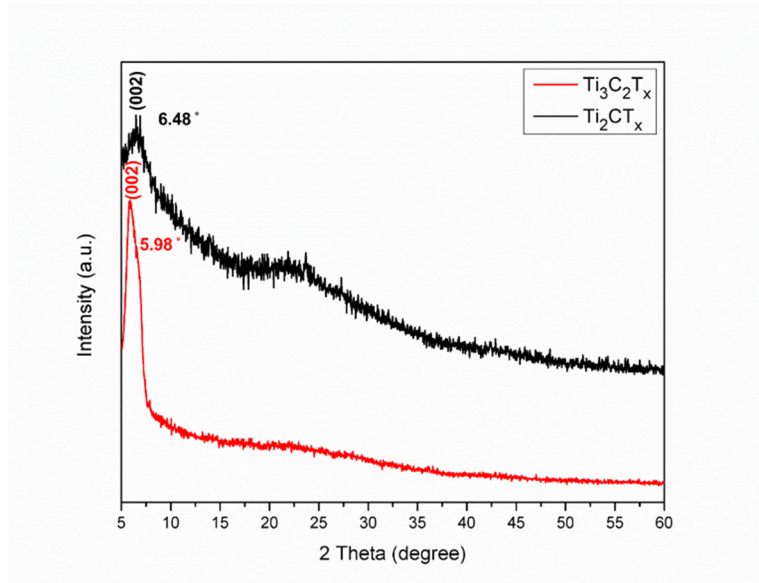

120

121 **Supplementary Figure 5.** XRD patterns of  $\text{Ti}_3\text{C}_2\text{T}_x$  and  $\text{Ti}_2\text{CT}_x$  MXene thin films.

122

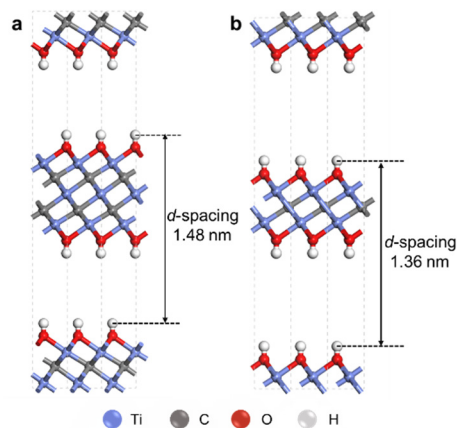

123

124 **Supplementary Figure 6.** Atomic structures of (a)  $\text{Ti}_3\text{C}_2\text{T}_x$ , (b)  $\text{Ti}_2\text{CT}_x$  MXenes and their  
 125 corresponding  $d$  –spacing values calculated from XRD (Supplementary Figure 5). The number of

126 MXene monolayers in a thin film was calculated as  $\text{Number of monolayers} = \frac{\text{Film thickness (from AFM)}}{d\text{-spacing}}$ .

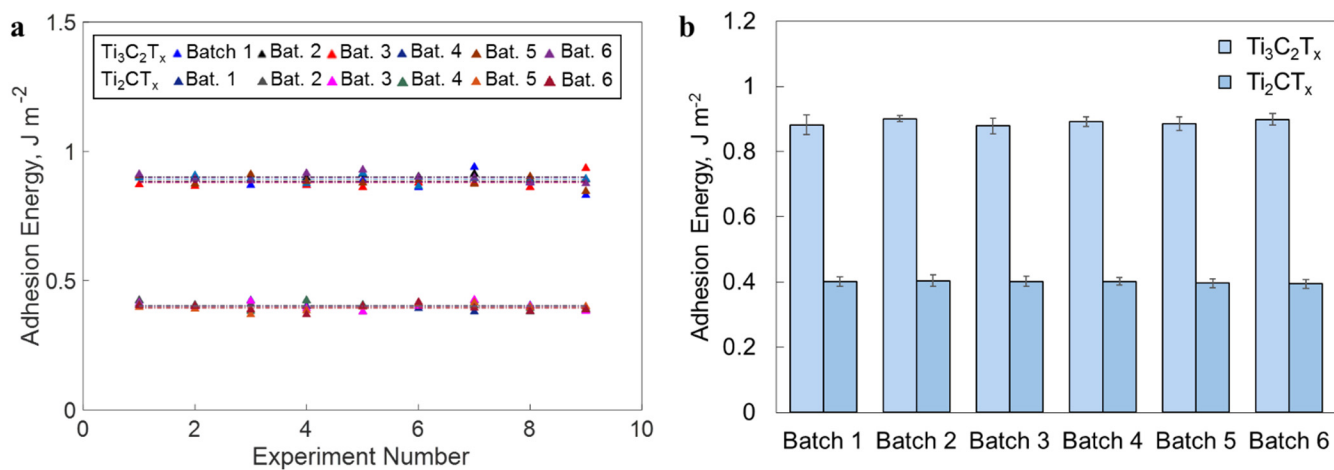

127

128 **Supplementary Figure 7.** (a) Batch-to-batch variations of adhesion energy, (b) average adhesion

129 energies with error bars indicating standard deviations.

130

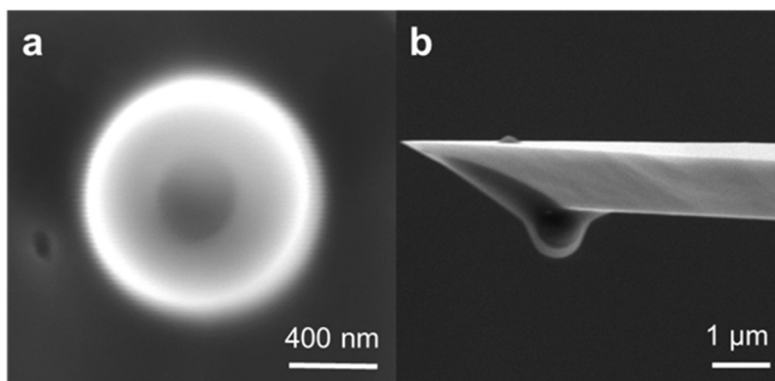

131

132 **Supplementary Figure 8.** SEM images of AFM SiO<sub>2</sub> microsphere tip. (a) Top and (b) side view

133 of the microsphere tip attached to the cantilever.

134

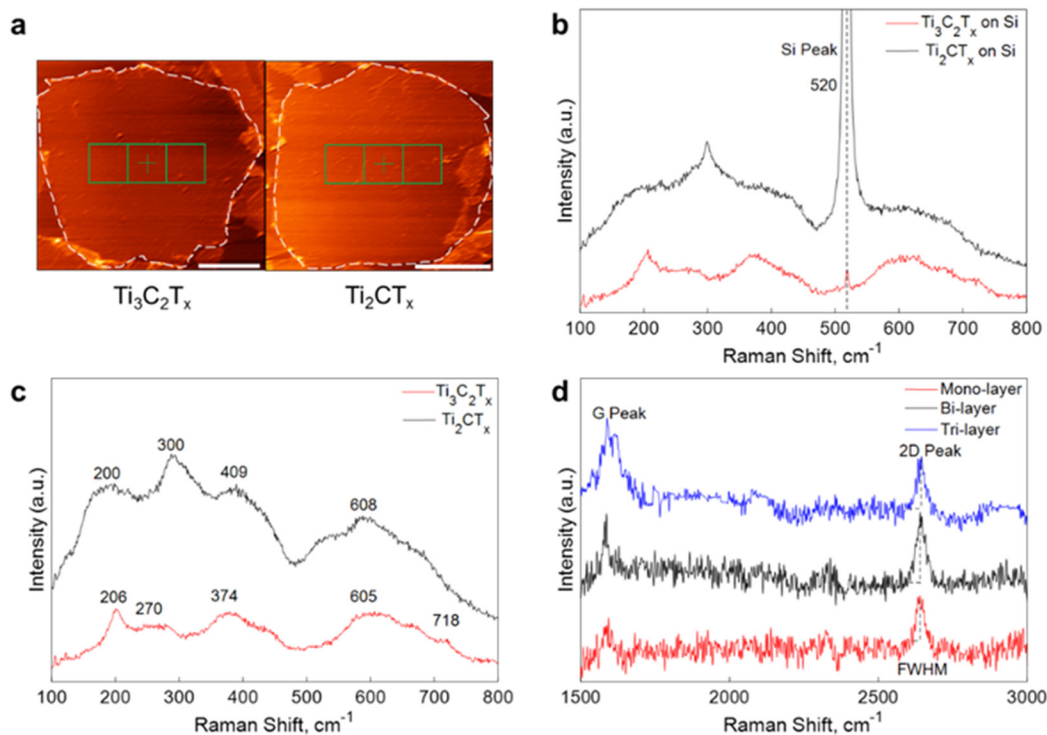

135  
 136 **Supplementary Figure 9.** (a) AFM scans of representative MXene flakes (scale bar 1  $\mu\text{m}$ ),  
 137 which were divided into 3 scanning areas individually. Raman spectra of (b)  $\text{Ti}_3\text{C}_2\text{T}_x$  and  $\text{Ti}_2\text{CT}_x$   
 138 on Si, (c)  $\text{Ti}_3\text{C}_2\text{T}_x$ ,  $\text{Ti}_2\text{CT}_x$  on the cover glass, and (d) mono-, bi-, and tri-layer graphene.

139

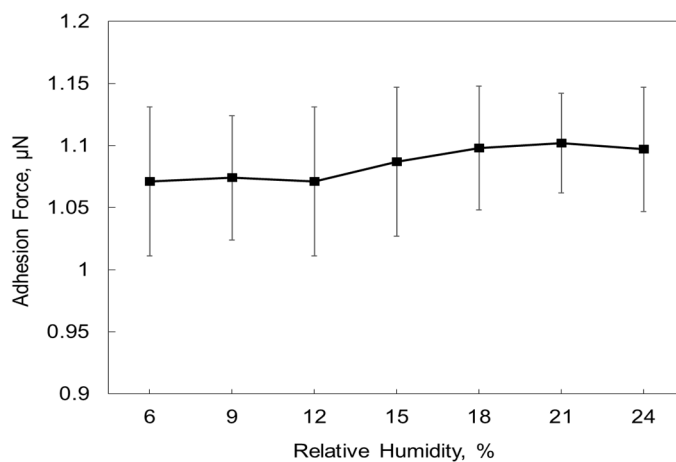

140  
 141 **Supplementary Figure 10.** Adhesion force of MXene film ( $\text{Ti}_3\text{C}_2\text{T}_x$ ) vs relative humidity.

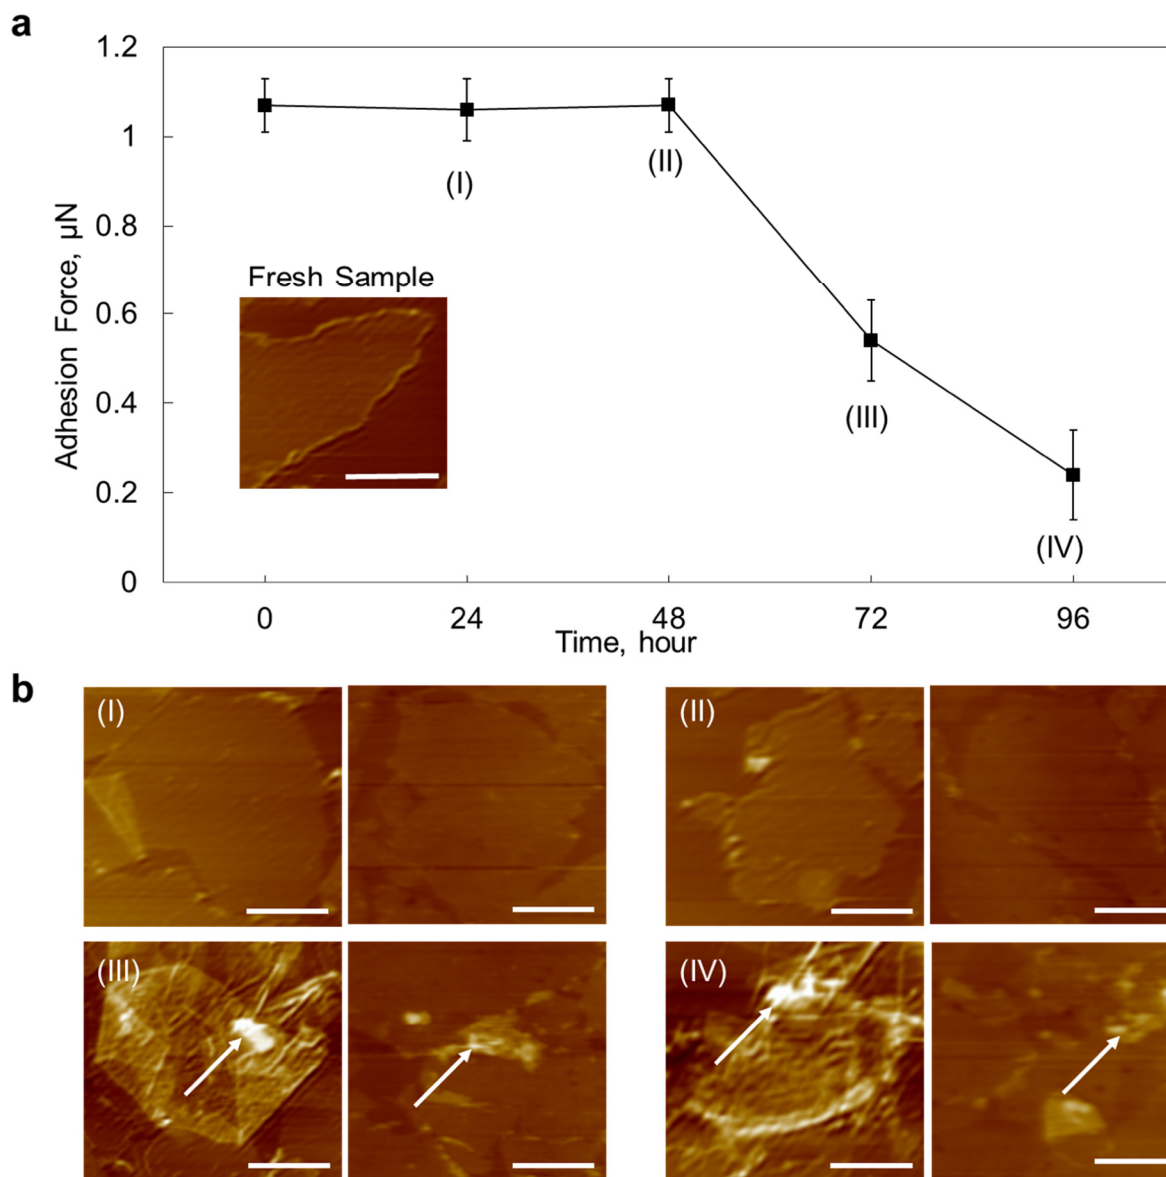

142  
 143 **Supplementary Figure 11.** (a) Adhesion force vs time of exposure in air under room temperature  
 144 for  $\text{Ti}_3\text{C}_2\text{T}_x$  flakes and (b) AFM images of  $\text{Ti}_3\text{C}_2\text{T}_x$  flakes taken at the time points indicated by  
 145 roman numbers that correspond to the points in panel (a). All scale bars are  $1 \mu\text{m}$ . The pairs of  
 146 AFM images show results from two different experiments, which were also averaged in panel (a).  
 147 Arrows indicate  $\text{TiO}_2$  nanoparticles formed as result of MXene oxidation.

148

149

150 **Supplementary References**

- 151 1. Cappella, B., & Dietler, G. Force-Distance Curves by Atomic Force Microscopy. *Surf. Sci.*  
152 *Rep.* **34**, 1-104 (1999).
- 153 2. Jiang, T. & Zhu, Y. Measuring Graphene Adhesion Using Atomic Force Microscopy with  
154 A Microsphere Tip. *Nanoscale* **7**, 10760-10766 (2015).
- 155 3. Carpick, R. W., Ogletree, D. F. & Salmeron, M. A General Equation for Fitting Contact  
156 Area and Friction vs Load Measurements. *J. Colloid Interface Sci.* **211**, 395-400 (1999).
- 157 4. Gao, W., Xiao, P., Henkelman, G., Liehti, K. M. & Huang, R. Interfacial Adhesion  
158 between Graphene and Silicon Dioxide by Density Functional Theory with Van Der Waals  
159 Corrections. *J. Phys. D: Appl. Phys.* **47**, 255301 (2014).
- 160 5. Hope, M. A. *et al.* NMR Reveals the Surface Functionalisation of Ti<sub>3</sub>C<sub>2</sub> MXene. *Phys.*  
161 *Chem. Chem. Phys.* **18**, 5099-5102 (2016).
- 162
